# Supplementary material for: Dual-ligand strategies to assemble S, N-containing metal organic framework nanoflowers for hybrid supercapacitors
Source: Royal Society of Chemistry journal article supplement (doi:10.1039/d2nj00957a), 2022-01-01
Supplement: d2nj00957a1.pdf [file d2nj00957a1.pdf]

**Dual-ligand strategies to assemble S, N-containing metal  
organic frameworks nanoflower for hybrid supercapacitors**

Guojing Li, Wenjun, Zhang\*, Ruxin Liu, Wenjing Liu, Jihui Li\*

School of Chemical Engineering, Hebei University of Technology, Tianjin 300130,  
People's Republic of China

Email: [wjzhang@hebut.edu.cn](mailto:wjzhang@hebut.edu.cn); [leejh@hebut.edu.cn](mailto:leejh@hebut.edu.cn)

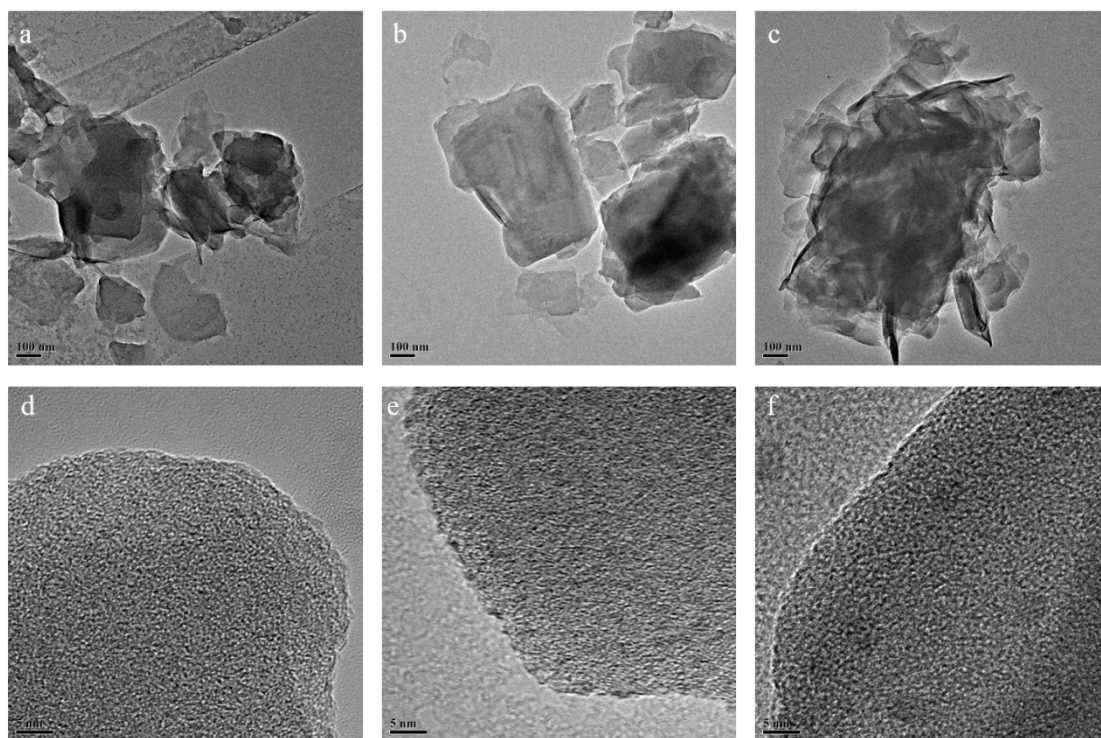

**Fig. S1** TEM image of (a) MOF1; (b) MOF2 and (c) MOF3; HRTEM image of (d) MOF1; (e) MOF2 and (f) MOF3

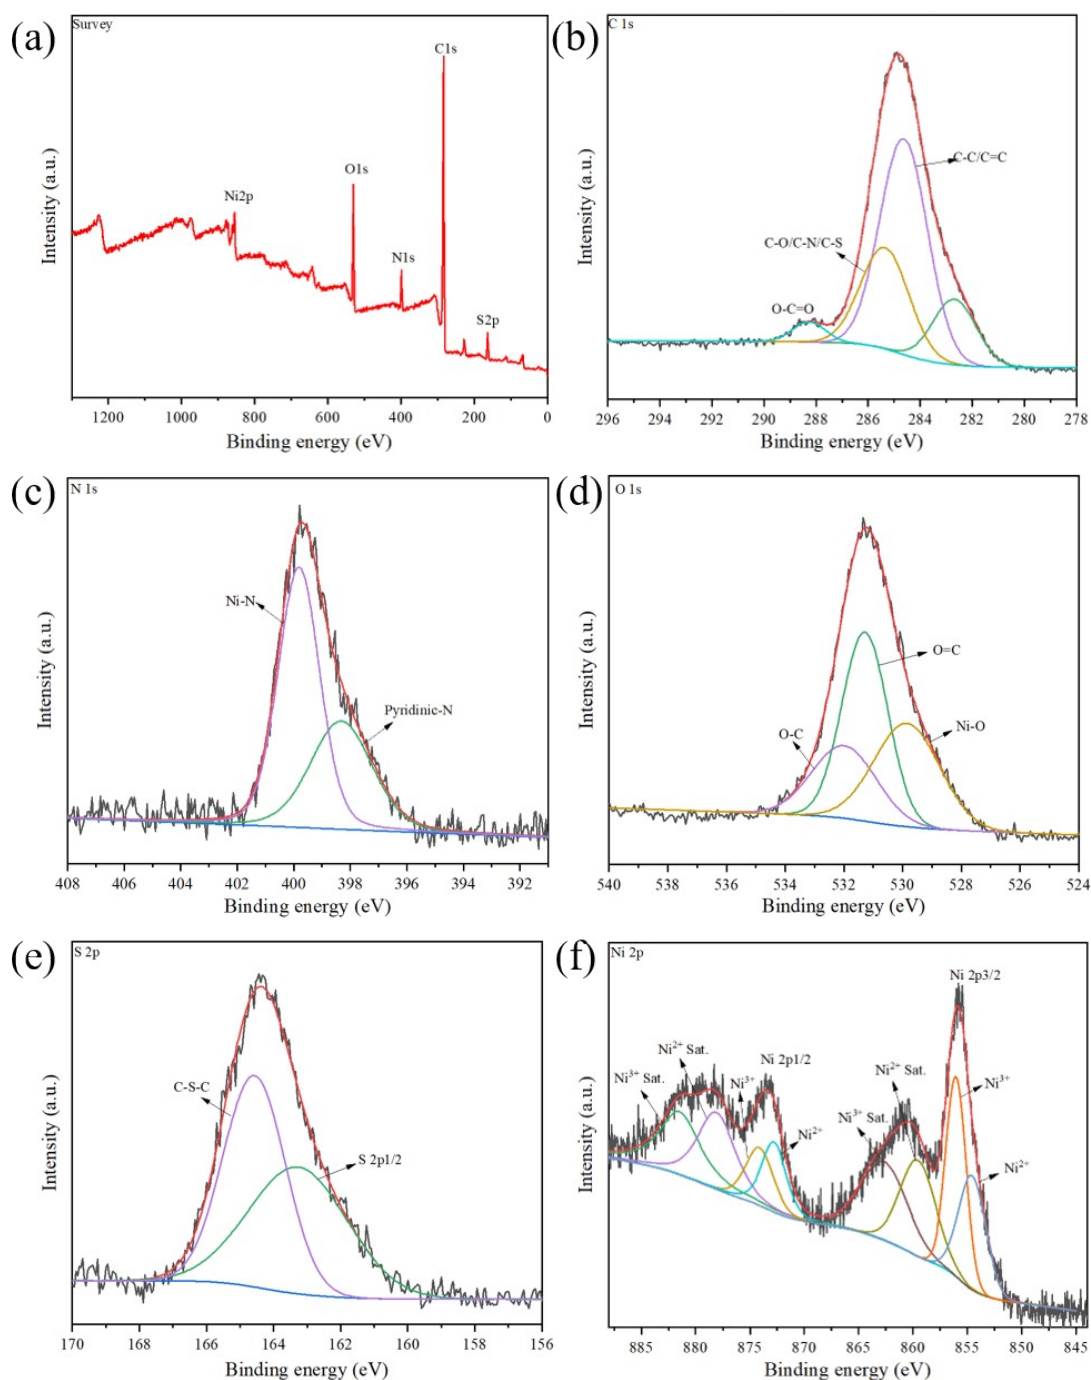

**Fig. S2** (a) XPS survey spectrum; (b) high-resolution of C 1s XPS spectrum; (c) high-resolution of N 1s XPS spectrum; (d) high-resolution of O 1s XPS spectrum; (e) high-resolution of S 2p XPS spectrum, and (f) high-resolution of Ni 2p XPS spectrum of MOF1

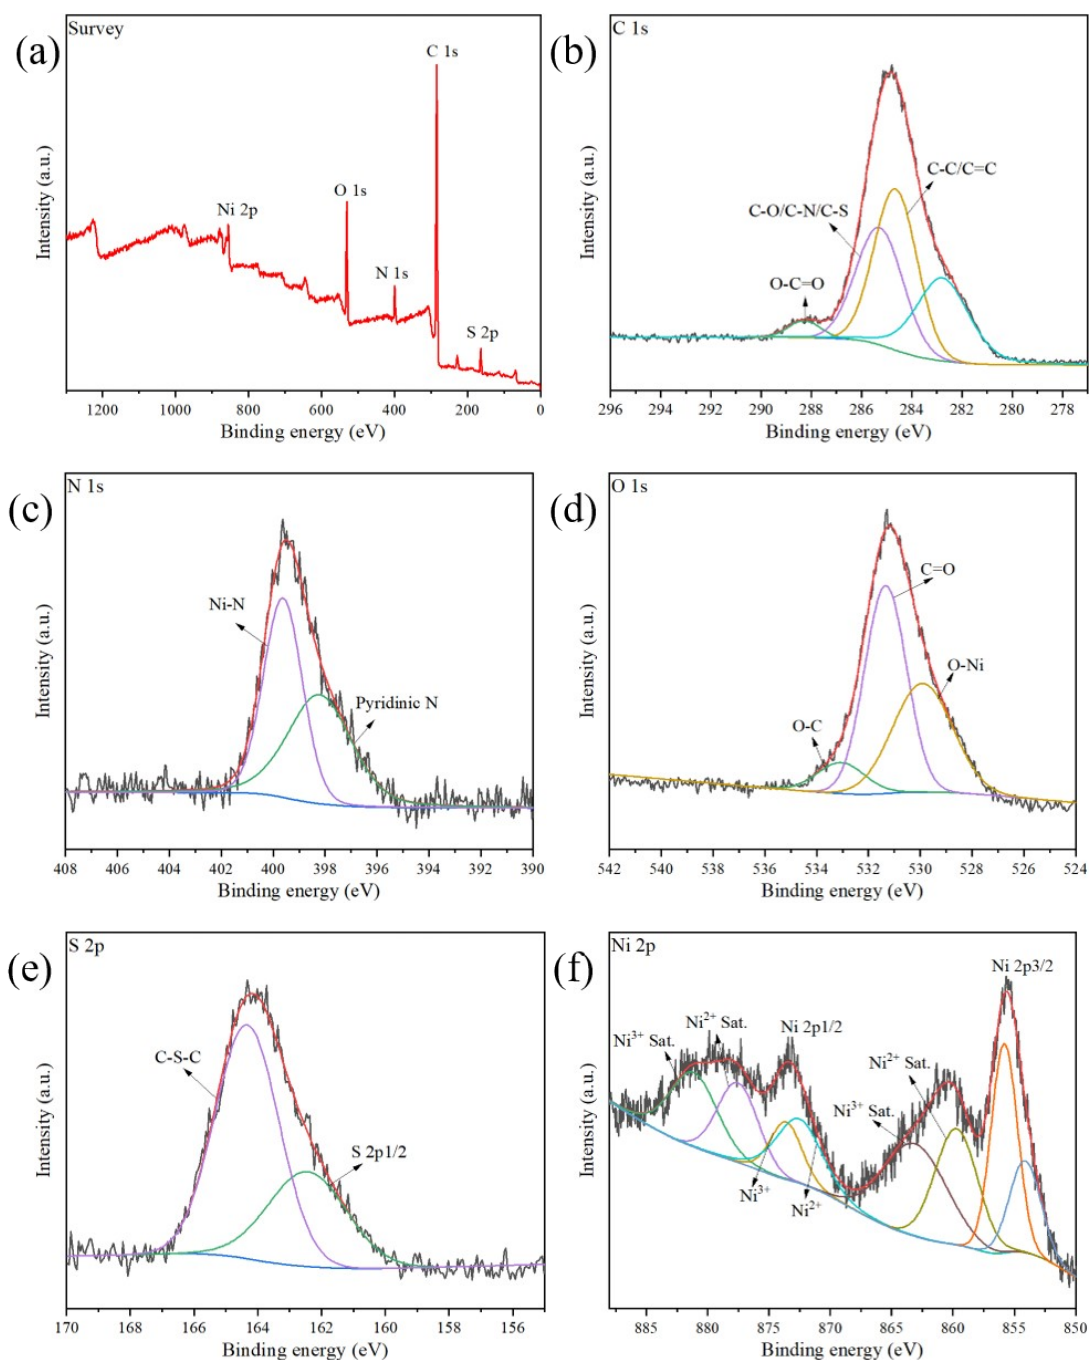

**Fig. S3** (a) XPS survey spectrum; (b) high-resolution of C 1s XPS spectrum; (c) high-resolution of N 1s XPS spectrum; (d) high-resolution of O 1s XPS spectrum; (e) high-resolution of S 2p XPS spectrum, and (f) high-resolution of Ni 2p XPS spectrum of MOF3

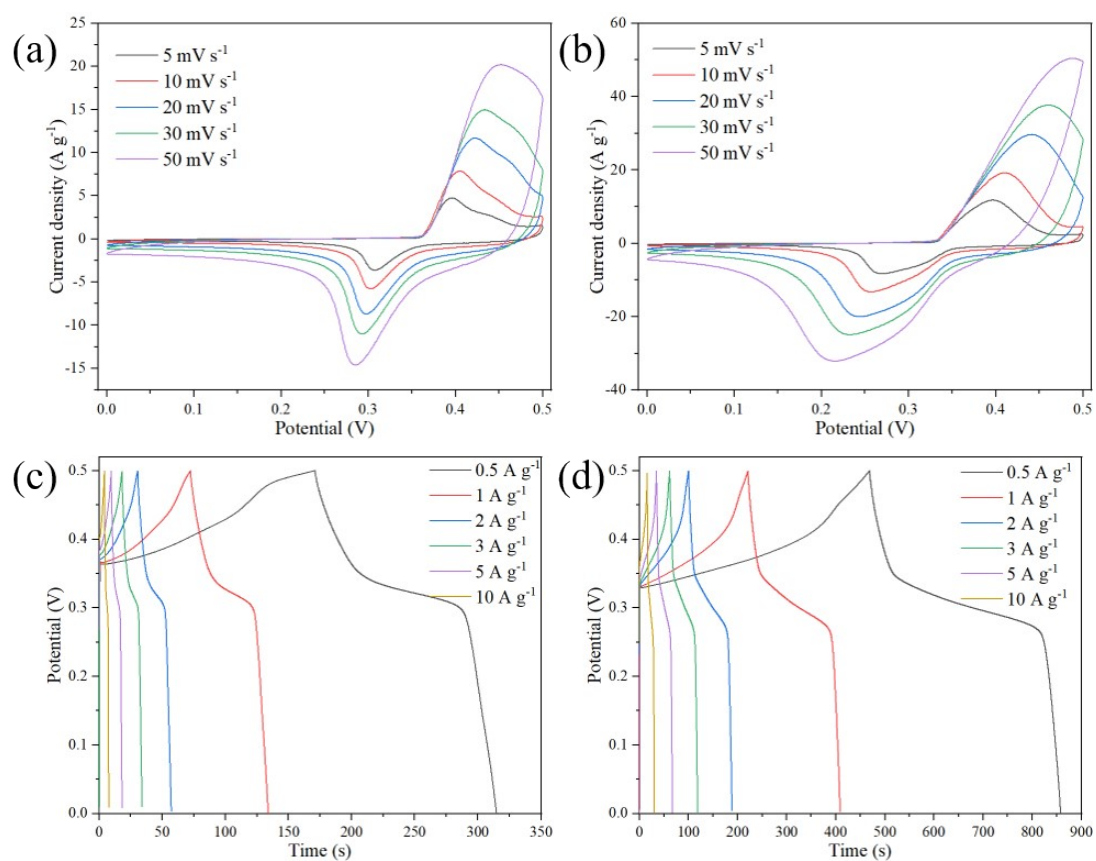

**Fig. S4** CV curves of (a) MOF1 and (b) MOF3 with the scan rates from 5  $\text{mV s}^{-1}$  to 50  $\text{mV s}^{-1}$ ; GCD curves of (c) MOF1 and (d) MOF3 with the current densities from 0.5 to 10  $\text{A g}^{-1}$

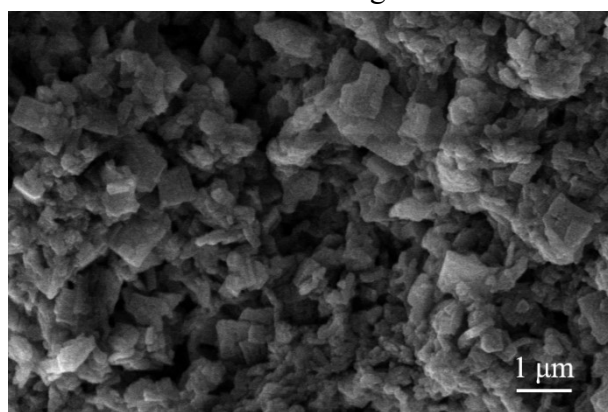

**Fig. S5** SEM image of MOF2 after electrochemical testing
